# Supplementary material
Source: Springer Nature journal article supplement (https://www.springermedizin.de/resource/supplementary/12939_2010_183_MOESM1_ESM.pdf/9550652)
Supplement: MOESM1 [file 9550652]

**Population in  
Korskærparken**

**1842**

**Adults above the age of 16**

**1321**

**Children**

**521**

**Sample of phone numbers  
for phone interviews**

**1079 (82 %)**

**Participating in personal  
interviews**

**73 (6 %)**

**Participating in phone  
interviews 335 (31 %)**
